# Supplementary material for: A metal–phenolic nanotuner induces cancer pyroptosis for sono-immunotherapy
Source: Royal Society of Chemistry journal article supplement (doi:10.1039/d4bm01292e), 2024-12-03
Supplement: d4bm01292e1.pdf [file d4bm01292e1.pdf]

Supporting Information

**A metal–phenolic nanotuner launches cancer pyroptosis for sono-immune therapy**

*Guohao Wang,<sup>‡a</sup> Dongmei Wang,<sup>‡b</sup> Huimin Tian,<sup>‡c</sup> Lu Xia,<sup>a</sup> Dongyan Shen,<sup>a</sup>  
Zhanxiang Wang<sup>\*d</sup> and Yunlu Dai<sup>\*e,f</sup>*

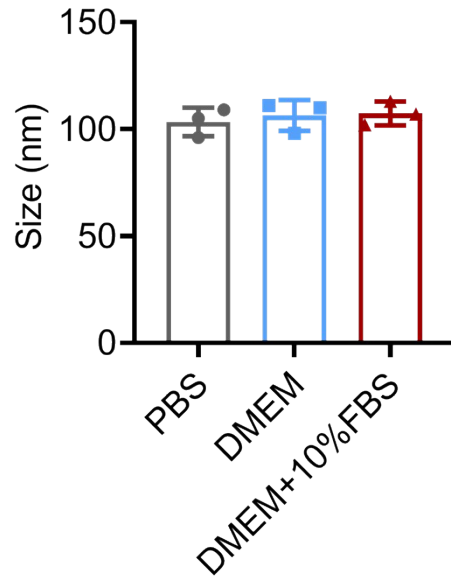

**Fig. S1.** Diameters of HTA NPs stored in PBS, DMEM and DMEM containing 10% of fetal bovine serum (FBS) for 3 days.

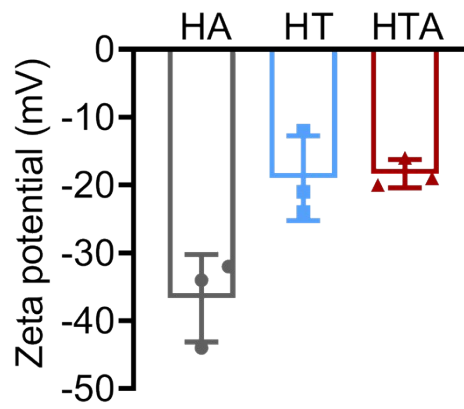

**Fig. S2.** Zeta potential analyses of HA, HT, and HTA NPs.

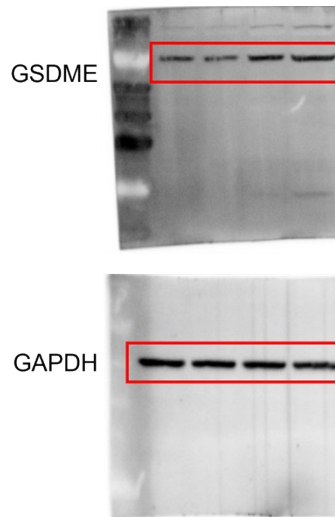

**Fig. S3.** The image of the full gel and blot of Fig. 2b.

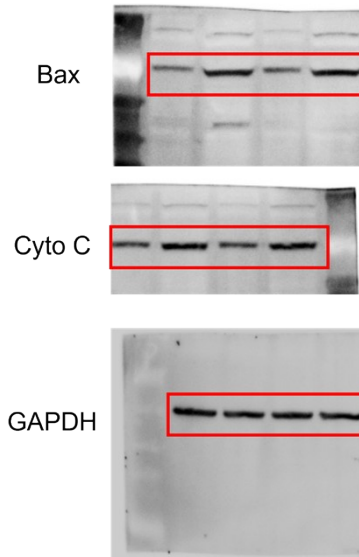

**Fig. S4.** The image of the full gel and blot of Fig. 3b.

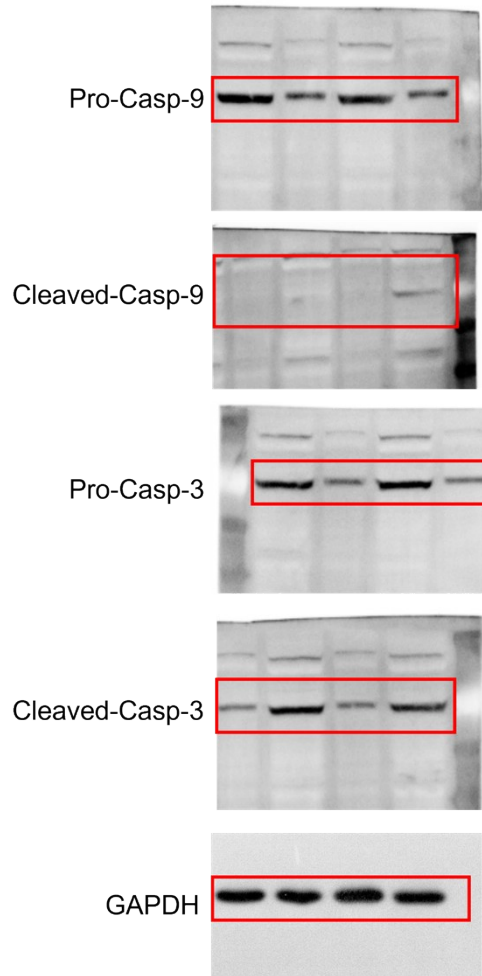

**Fig. S5.** The image of the full gel and blot of Fig. 3c.

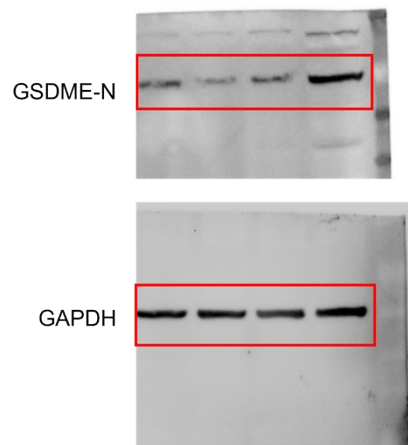

**Fig. S6.** The image of the full gel and blot of Fig. 3d.

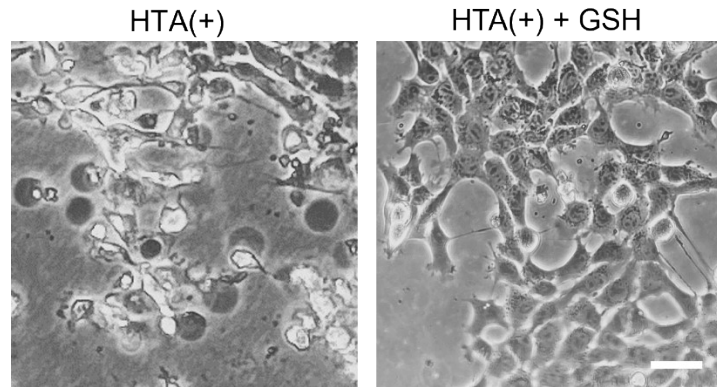

**Fig. S7.** GSH (glutathione), inhibitor of ROS, blocked HTA(+)-induced pyroptosis. PWE(+) for PWE plus ultrasound (1.0 MHz, 1.0 W/cm<sup>2</sup>, 50% duty cycle). Scale bar: 20  $\mu$ m.

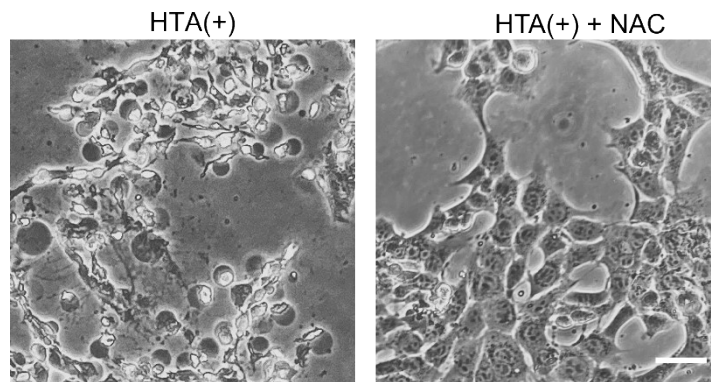

**Fig. S8.** NAC (N-acetyl-L-cysteine), inhibitor of ROS, HTA(+)-induced pyroptosis. PWE(+) for PWE plus ultrasound (1.0 MHz, 1.0 W/cm<sup>2</sup>, 50% duty cycle). Scale bar: 20  $\mu$ m.

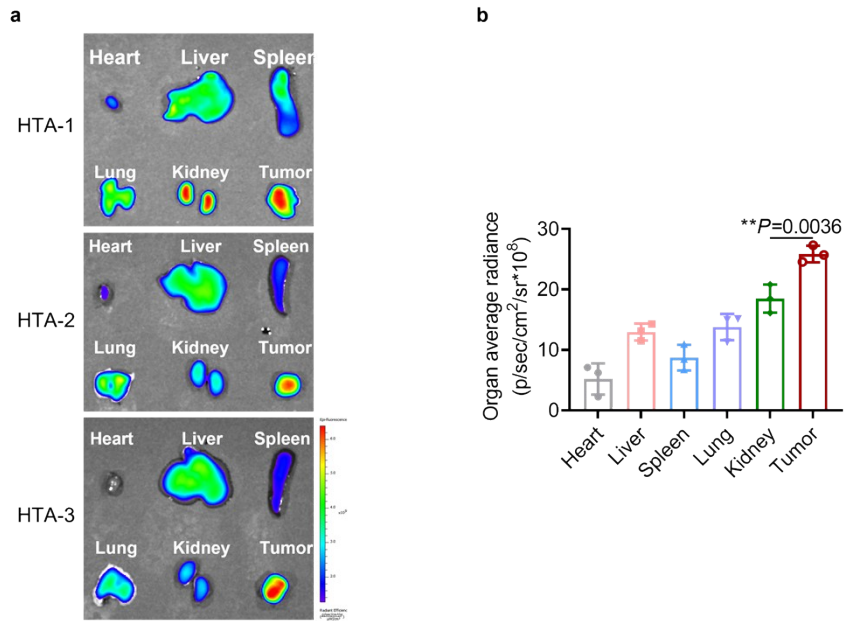

**Fig. S9.** Fluorescence imaging (a) and quantification of fluorescence intensity (b) in organs and tumors harvested from mice 48 hours after injection of HTA nanoparticles, which were labeled with ICG on HA-DA. The study included  $n = 3$  biologically independent animals per group.

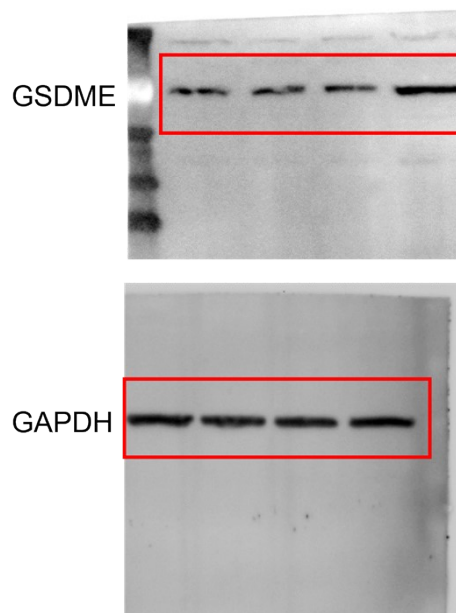

**Fig. S10.** The image of the full gel and blot of Fig. 4d.

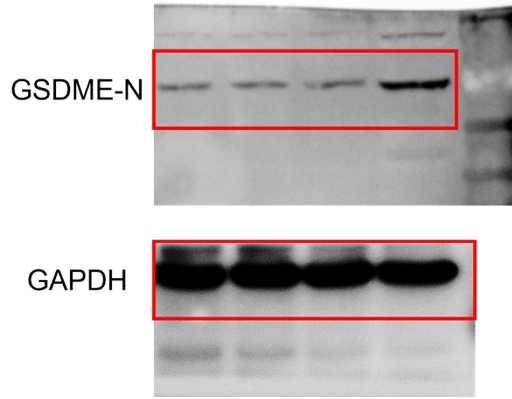

**Fig. S11.** The image of the full gel and blot of Fig. 4f.

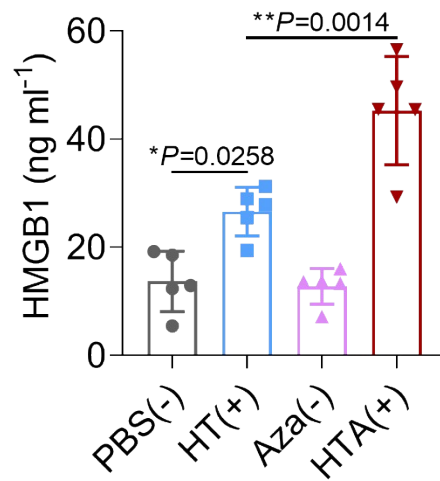

**Fig. S12.** HMGB1 levels in the supernatants of 4T1 cells after different treatments. (n = 5)

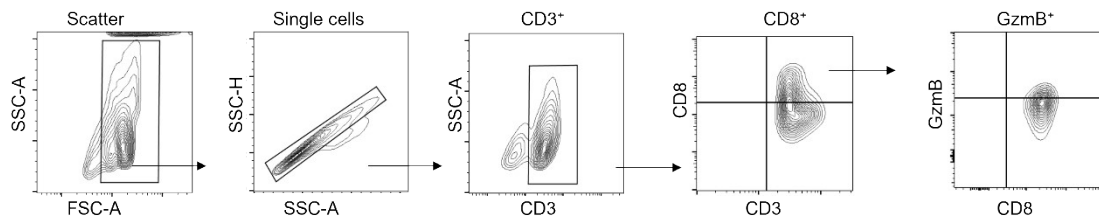

**Fig. S13.** Flow cytometry gating strategies for CD3<sup>+</sup>CD8<sup>+</sup> and CD3<sup>+</sup>CD8<sup>+</sup>GzmB<sup>+</sup> T cells panel in TDLN.

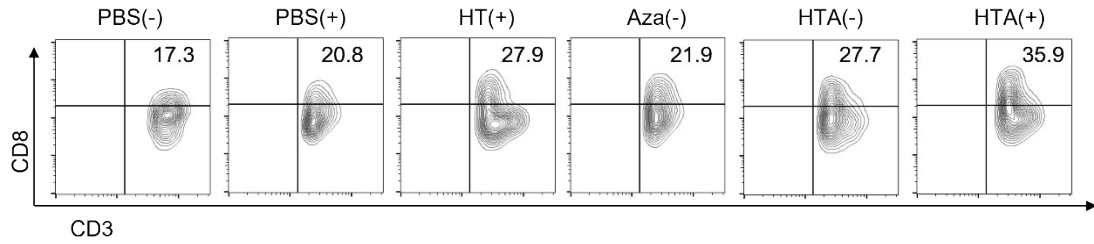

**Fig. S14.** Flow cytometric plots of CD3<sup>+</sup>CD8<sup>+</sup> T cells collected from TDLN.

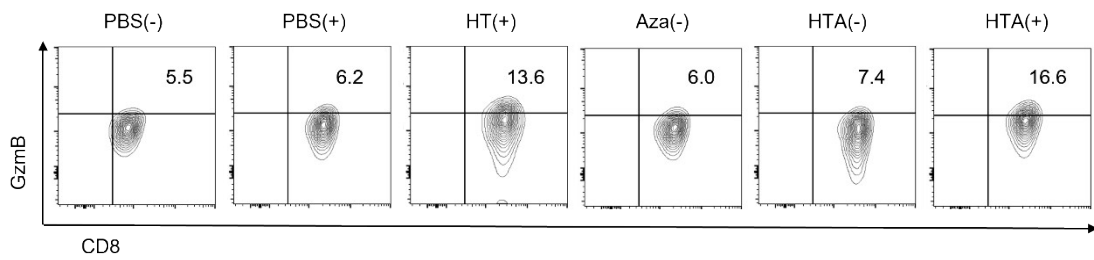

**Fig. S15.** Flow cytometric plots of CD8<sup>+</sup> T cells expressing granzyme B<sup>+</sup> collected from TDLN.

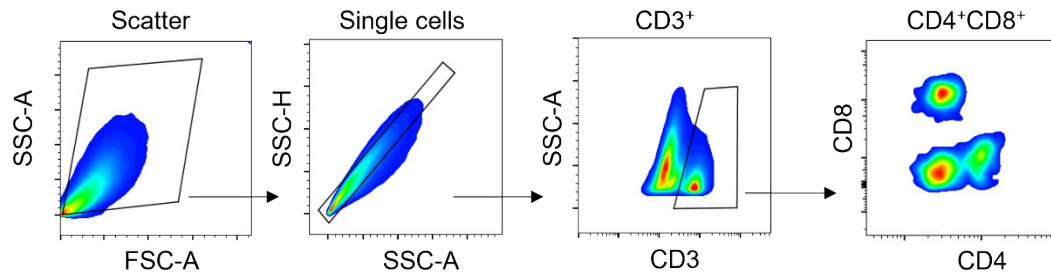

**Fig. S16.** Representative flow cytometry gating strategies for CD3<sup>+</sup>CD4<sup>+</sup> and CD3<sup>+</sup>CD8<sup>+</sup> T cells in distant tumor tissue.



**Table S1. Ti<sup>IV</sup> Loading efficiency in HTA**

| HA-DA: TiO <sub>2</sub> : Aza<br>(w/w) | Ti <sup>IV</sup> Loading content (wt<br>%) | Loading efficiency<br>(%) |
|----------------------------------------|--------------------------------------------|---------------------------|
| 30:1:1                                 | 1.96                                       | 62.72                     |
| 30:5:1                                 | 11.86                                      | 85.39                     |
| 30:10:1                                | 13.65                                      | 55.97                     |

**Table S2. Aza Loading efficiency in HTA**

| HA-DA: TiO <sub>2</sub> : Aza<br>(w/w) | Aza Loading content (wt<br>%) | Loading efficiency<br>(%) |
|----------------------------------------|-------------------------------|---------------------------|
| 30:1:1                                 | 2.27                          | 72.64                     |
| 30:5:1                                 | 2.43                          | 87.48                     |
| 30:10:1                                | 2.16                          | 88.56                     |
